# Supplementary material for: High Yields of Oligodendrocyte Lineage Cells from Human Embryonic Stem Cells at Physiological Oxygen Tensions for Evaluation of Translational Biology
Source: PubMed Central journal article supplement — Stem Cell Reports. 2013 Oct 31;1(5):437–50. doi: 10.1016/j.stemcr.2013.09.006 (PMC3841262; doi:10.1016/j.stemcr.2013.09.006), 2013-10-31
Supplement: mmc1.pdf [file mmc1.pdf]

## **Stem Cell Reports, Volume 1**

### **Supplemental Information**

#### **High Yields of Oligodendrocyte Lineage Cells from Human Embryonic Stem Cells at Physiological Oxygen Tensions for Evaluation of Translational Biology**

Sybil R.L. Stacpoole, Sonia Spitzer, Bilada Bilican, Alastair Compston, Ragnhildur Karadottir, Siddharthan Chandran, and Robin J.M. Franklin

#### **Inventory of Supplementary Information**

1. Supplementary Figure 1 – oligodendrocyte lineage cells were derived from the HUES-9 cell line with similar efficiency; linked to figures 2 and 3
2. Supplementary Figure 2 – hESC-NPC derived OPCs do not express neuronal or astrocytic markers; linked to figure 2
3. Supplementary Table 1 – PCR Primers; linked to methods
4. Supplementary Table 2 – Details of Primary Antibodies used for Immunolabelling; linked to methods

**Supplementary Information:**

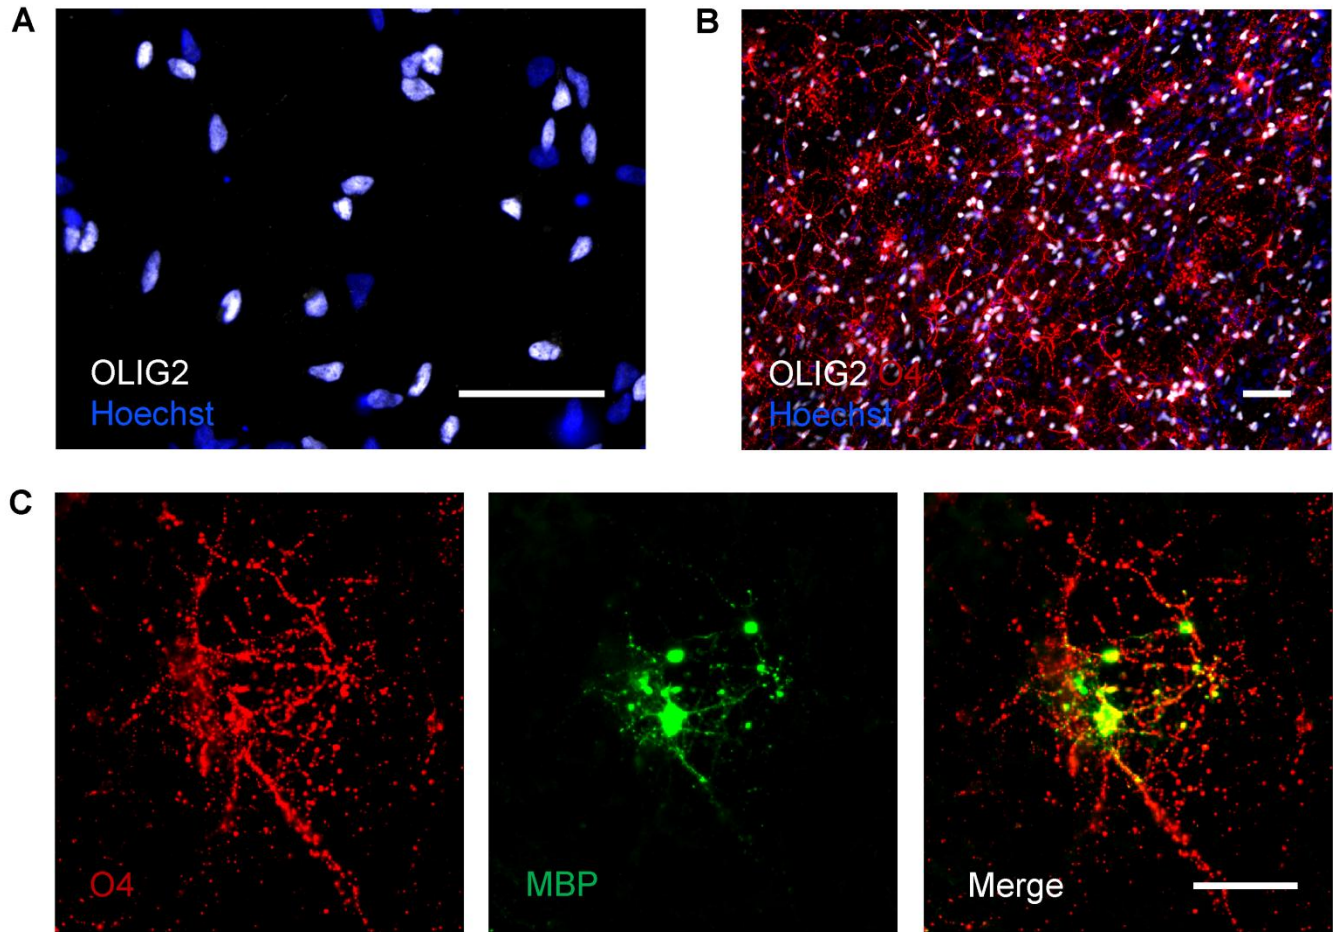

**Supplementary Figure One:** Oligodendrocyte lineage cells were derived from the HUES-9 cell line with similar efficiency; related to Figures 2 and 3.

(a) OLIG2 induction at D28-35 in HUES-9 hESC-derived NPCs via the FGF-2/SHH ventral forebrain route was equivalent to that achieved with the H9 cell line ( $53.1 \pm 4.2\%$ ). (b) After 5 weeks of terminal differentiation of D100 hESC-NPCs, large numbers of O4<sup>+</sup> oligodendrocytes were generated from the HUES-9 line ( $46 \pm 6\%$ ) (c) MBP expression was also observed in oligodendrocytes derived from HUES-9 hESCs. Scale bar = 50  $\mu\text{m}$ .

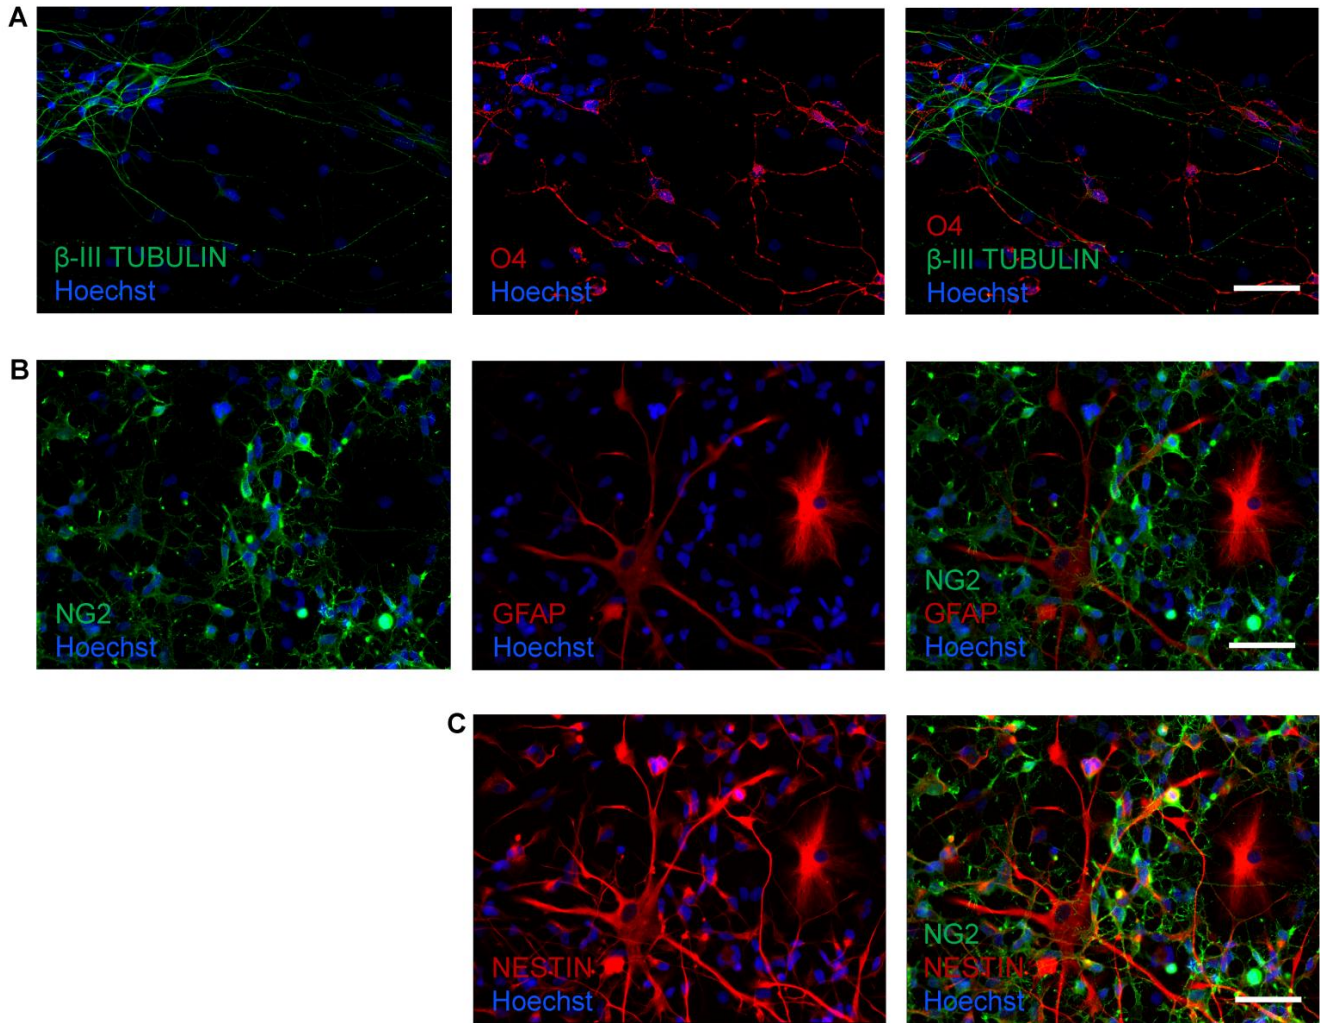

**Supplementary Figure Two:** hESC-NPC derived OPCs do not express neuronal or astrocytic markers; related to Figure 2.

(a&b) There was no overlap in expression between  $\beta$ -III tubulin and O4, nor of NG2 and GFAP, indicating that cells labeled with NG2 or O4 were indeed oligodendroglial lineage cells rather than neurons or astrocytes. (b&c) NG2 expression did overlap with NESTIN, but only in the NESTIN+ population that did not express GFAP. b&c show the same field of view for clarity of comparison of marker co-expression. Scale bar = 50  $\mu$ m.

**Supplementary Table 1:** PCR Primers; related to methods and Figure 1.

|                   |                                |
|-------------------|--------------------------------|
| <i>β-ACTIN</i> F: | 5'-GTTACAGGAAGTCCCTTGCCATCC-3' |
| <i>β-ACTIN</i> R: | 5'-CACCTCCCCTGTGTGGACTTGGG-3'  |
| <i>GSX2</i> F:    | 5'-AGCCTGAGCCGAGCGGTACTC-3'    |
| <i>GSX2</i> R:    | 5'-CTGGTCCTCACGTCCCCCGC-3'     |
| <i>HOXB4</i> F:   | 5'-GTGAGCACGGTAAACCCCAAT-3'    |
| <i>HOXB4</i> R:   | 5'-CGAGCGGATCTTGGTGTTG-3'      |
| <i>NKX2.1</i> F:  | 5'-AACCAAGCGCATCCAATCTCAAGG    |
| <i>NKX2.1</i> R:  | 5'-TGTGCCAGAGTGAAGTTTGGTCT -3' |
| <i>PAX6</i> F:    | 5'-ATGTGTGAGTAAAATTCTGGGCA-3'  |
| <i>PAX6</i> R:    | 5'-GCTTACAACCTTCTGGAGTCGCTA-3' |

**Supplementary Table 2:** Details of Primary Antibodies used for Immunolabelling; related to methods.

| <b>Primary Antibody</b>    | <b>Isotype</b>       | <b>Concentration</b> | <b>Manufacturer</b>     |
|----------------------------|----------------------|----------------------|-------------------------|
| β-III TUBULIN              | Mouse<br>IgG2b       | 1 in 1000            | Sigma<br>T8660          |
| GALC                       | Mouse<br>IgG3        | 1 in 100             | Chemicon<br>MAB342      |
| GFAP                       | Rabbit<br>polyclonal | 1 in 1000            | Dako<br>Z0334           |
| MBP                        | Rat                  | 1 in 100             | Abcam<br>AB7349         |
| NESTIN<br>(human specific) | Mouse<br>IgG1        | 1 in 500             | Chemicon<br>MAB5326     |
| NG2                        | Mouse<br>IgG2a       | 1 in 250             | BD Pharmingen<br>554275 |
| NG2                        | Rabbit<br>polyclonal | 1 in 200             | Chemicon<br>AB5320      |
| NKX2.2                     | Mouse<br>IgG2b       | 1 in 75              | DSHB<br>74.5A5          |
| O1                         | Mouse<br>IgM         | 1 in 1000            | R&D systems<br>MAB1327  |
| O4                         | Mouse<br>IgM         | 1 in 1000            | R&D systems<br>MAB1326  |
| OLIG2                      | Rabbit<br>polyclonal | 1 in 500             | Chemicon<br>AB9610      |
| PDGF-R $\alpha$            | Rabbit<br>polyclonal | 1 in 250             | Santa Cruz<br>SC-338    |
| VIMENTIN                   | Chick                | 1 in 500             | Chemicon<br>AB5733      |
